# Supplementary material for: Transcription Factor McHB7 Improves Ice Plant Drought Tolerance through ABA Signaling Pathway
Source: MDPI journal article supplement (doi:10.3390/ijms25084569), 2024-04-22
Supplement: s1 [file s1]

## Supplementary figures and tables:

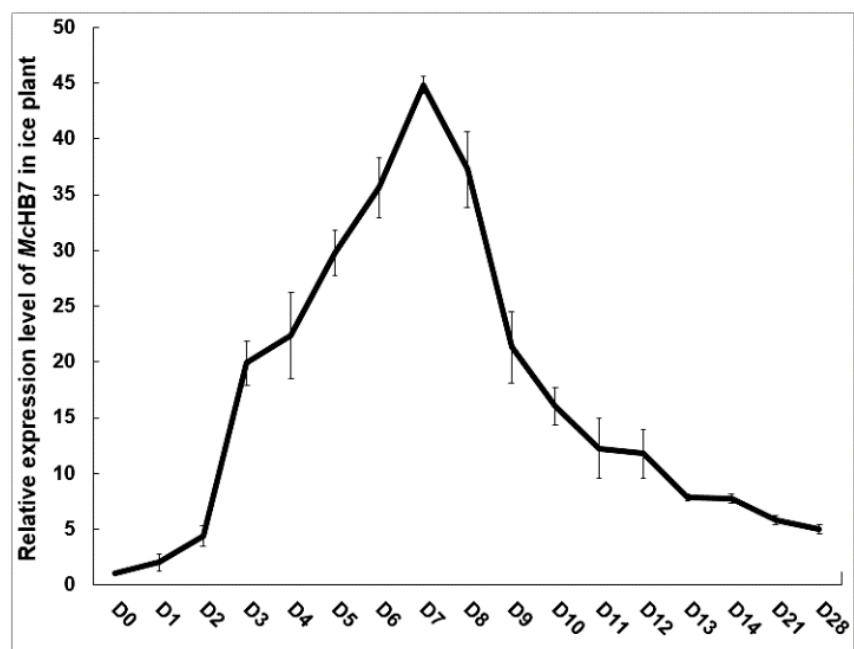

**Figure S1.** Relative expression level of *McHB7* gene in infiltrated ice plant leaves; D<sub>0</sub>-D<sub>28</sub>, The infiltrated leaves from day 0 to day 28.

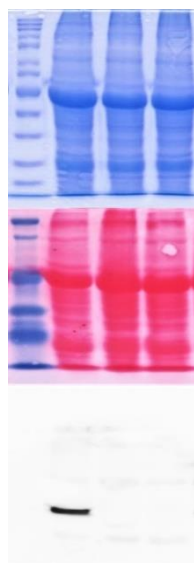

**Figure S2.** Original gel and Western images of the results shown in different main Figures.

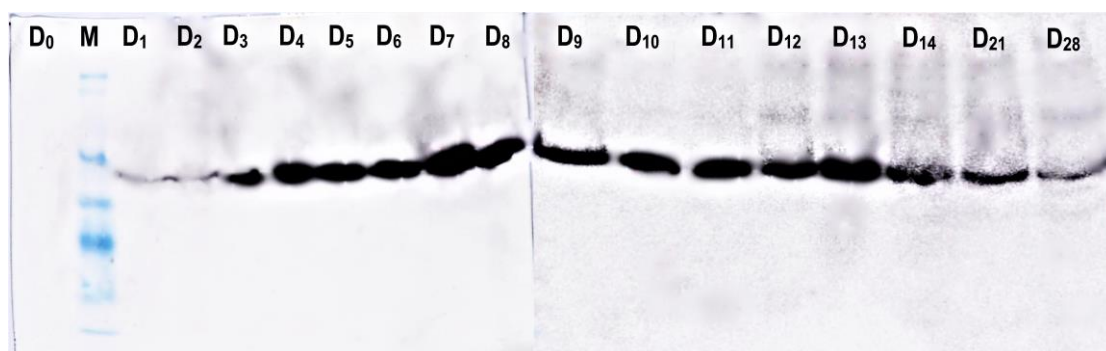

**Figure 1C.** Western blot analysis of extracted proteins from the ice plant leaves 1–3.

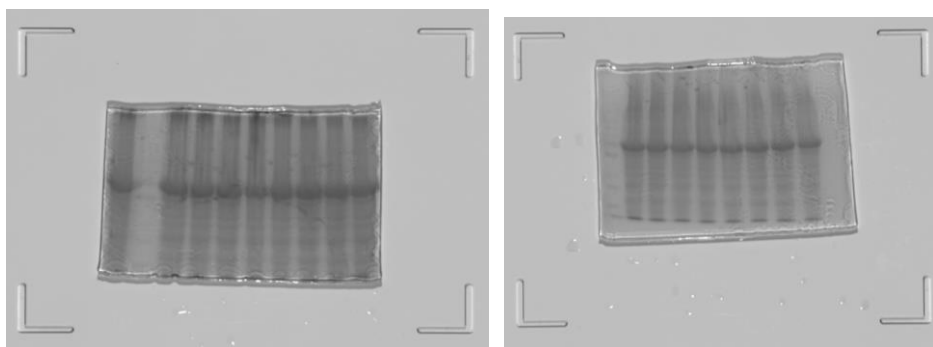

**Figure 1E.** Western blot of transgenic ice plant leaves from day 0 (D0) to day 28 (D28).

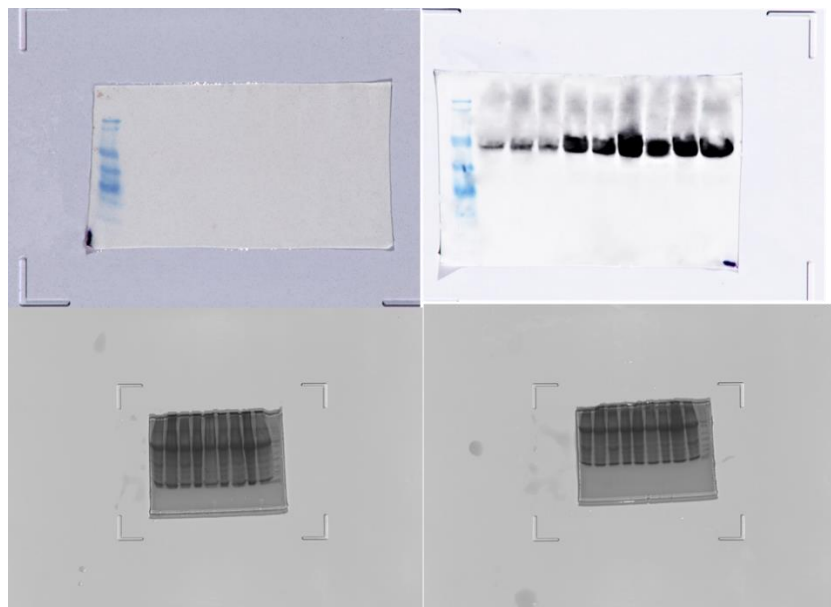

**Figure 2D.** McHB7 protein levels in the OE under control and drought stress compared with WT.

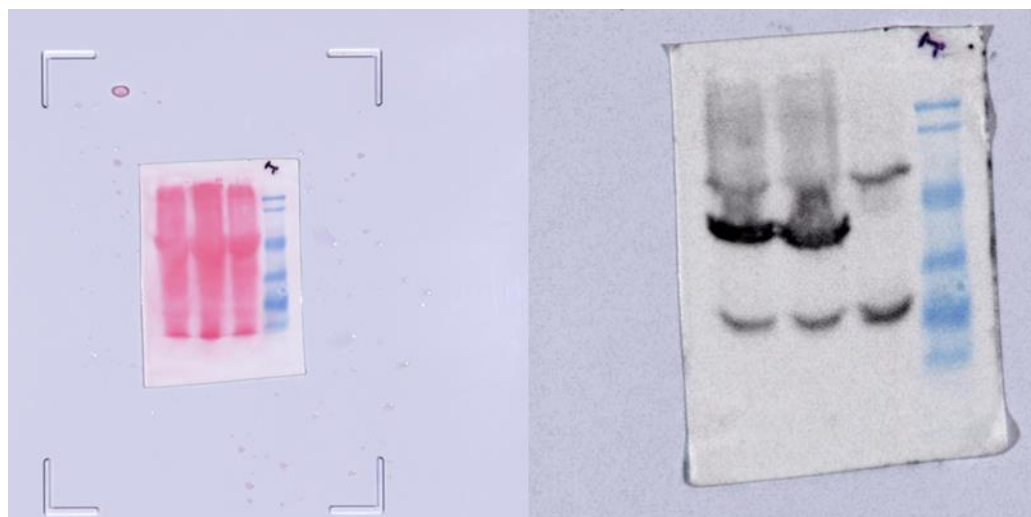

**Figure 7A.** IP result with the McHB7 bait.

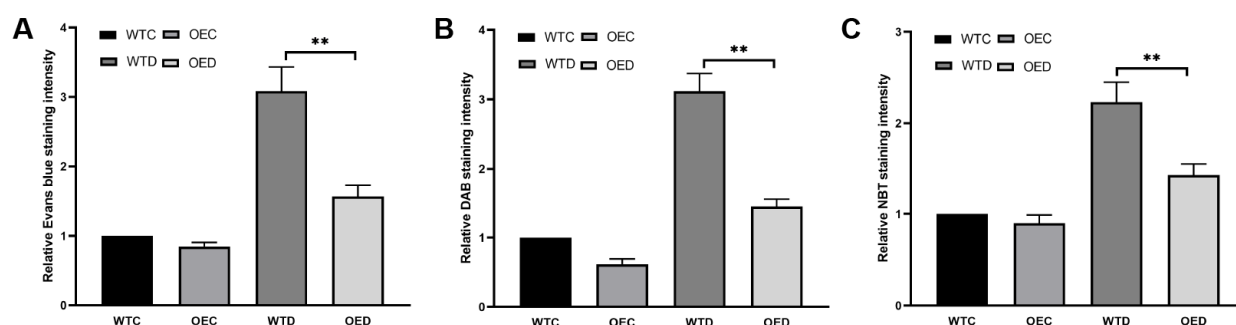

**Figure S3.** Data analysis of Evans blue, DAB and NBT staining corresponding to Figure 3H; (A) Relative Evans blue staining intensity; (B) Relative DAB staining intensity; (C) Relative NBT staining intensity.

**Supplementary Table S1.** List of primers, their sequences and purpose for this study.

| Primer Name       | Primer Sequence (5'-3')                                                                                                           | Purpose                                                                         |
|-------------------|-----------------------------------------------------------------------------------------------------------------------------------|---------------------------------------------------------------------------------|
| <i>fMcHB7F</i>    | CGCGGATCCATGATGTATGAAGAAGGAGAA                                                                                                    | For the construction of <i>McHB7-pCAMBIA1300-FLAG</i>                           |
| <i>fMcHB7R</i>    | CGGTCTAGATCAGGCGCCTTTGTCATCGTCATCCTTGTAG-TCTCCGCCTTTATCGTCATCGTCTTTATAATCTCCGCCTTTGTCATCGTCATCCTTGTAGTCTCCGCCGACCAAAATTCCCACCATTG |                                                                                 |
|                   |                                                                                                                                   |                                                                                 |
| <i>McPIP1;2F</i>  | GATGCCAAGAGGAGTGCTAG                                                                                                              | Internal primers used for RT-qPCR                                               |
| <i>McPIP1;2R</i>  | GTTCCAGTGATTGGGATGGTT                                                                                                             |                                                                                 |
| <i>rtMcHB7F</i>   | CGAGACGAACAGCAATAATAGT                                                                                                            | Primers for <i>McHB7</i> quantification by RT-qPCR                              |
| <i>rtMcHB7R</i>   | CTTCACACACATCGCATTCT                                                                                                              |                                                                                 |
| <i>AD-McHB7F</i>  | GGAATTCATGATGTATGAAGAAGGAGAA                                                                                                      | Primers used for the construction of <i>AD-McHB7</i> for yeast one-hybrid assay |
| <i>AD-McHB7R</i>  | CGAGCTCTCACGACCAAAATTCCCACCA                                                                                                      |                                                                                 |
| <i>p1F</i>        | AGCTTACGTAACGTAACGTAGAGCT                                                                                                         | Primers used for the construction of <i>pAbAi-ACGTA</i>                         |
| <i>p1R</i>        | TTACGTTACGTTACGTG                                                                                                                 |                                                                                 |
| <i>P2F</i>        | AGCTT TGTCATGTCATGTCAGAGCT                                                                                                        | Primers used for the construction of <i>pAbAi-TGTCA</i>                         |
| <i>P2R</i>        | TTGACATGACATGACAG                                                                                                                 |                                                                                 |
| <i>P3F</i>        | AGCTTTGTCGTGTCGTGTCGGAGCT                                                                                                         | Primers used for the construction of <i>pAbAi-TGTCTG</i>                        |
| <i>P3R</i>        | TCGACACGACACGACAG                                                                                                                 |                                                                                 |
| <i>P4F</i>        | AGCTTCACATCACATCACATGAGCT                                                                                                         | Primers used for the construction of <i>pAbAi-CACAT</i>                         |
| <i>P4R</i>        | TATGTGATGTGATGTGG                                                                                                                 |                                                                                 |
| <i>BD-McHB7F</i>  | CCATGGCCATGATGTATGAAGAAGGAGAA                                                                                                     | Primers used for the construction of <i>BD-McHB7</i> for transactivation assay  |
| <i>BD-McHB7R</i>  | GTCGACTCACGACCAAAATTCCCACCA                                                                                                       |                                                                                 |
| <i>BD-McHB7aF</i> | CCATGGCCATGATGTATGAAGAAGGAGAA                                                                                                     | Primers used for the construction of <i>BD-McHB7a</i>                           |
| <i>BD-McHB7aR</i> | GTCGACTCTCTTGTTCATCATCTTCTT                                                                                                       |                                                                                 |
| <i>BD-McHB7bF</i> | CCATGGCCCGATTGACGACGATCAAGTG                                                                                                      | Primers used for the construction of <i>BD-McHB7b</i>                           |
| <i>BD-McHB7bR</i> | GTCGACTCACGACCAAAATTCCCACCA                                                                                                       |                                                                                 |
| <i>BD-McHB7cF</i> | CCATGGCCATGATGTATGAAGAAGGAGAA                                                                                                     | Primers used for the construction of <i>BD-McHB7c</i>                           |
| <i>BD-McHB7cR</i> | GTCGACCTTGTAACGAGCCCTCTTGTT                                                                                                       |                                                                                 |
| <i>BD-McHB7dF</i> | CCATGGCCAAGCAGCTAGAGCAGAGTAT                                                                                                      | Primers used for the construction of <i>BD-McHB7d</i>                           |
| <i>BD-McHB7dR</i> | GTCGACTCACGACCAAAATTCCCACCA                                                                                                       |                                                                                 |
| <i>BD-McHB7eF</i> | CCATGGCCATGATGTATGAAGAAGGAGAA                                                                                                     | Primers used for the construction of <i>BD-McHB7e</i>                           |
| <i>BD-McHB7eR</i> | GTCGACATCTTTCAACTTCTGTATCTG                                                                                                       |                                                                                 |
| <i>BD-McHB7fF</i> | CCATGGCCATAGCGCGAGGAAGGGAGAA                                                                                                      | Primers used for the construction of <i>BD-McHB7f</i>                           |
| <i>BD-McHB7fR</i> | GTCGACTCACGACCAAAATTCCCACCA                                                                                                       |                                                                                 |
